# Supplementary material
Source: publisher site journal article supplement (https://www.spandidos-publications.com/7222/downloadSupplementary)
Supplement: Supplementary file 1 [file downloadSupplementary]

Table SII. Primers used for quantitative PCR.

| Gene name      | Sense (5'-3')                | Antisense (3'-5')           |
|----------------|------------------------------|-----------------------------|
| BDNF           | CTTGGACAGAGCCAACGGAT         | GCAGCCTTCATGCAACCAAA        |
| GPER1          | AGTCGGATGTGAGGTTTCAG         | TCTGTGTGAGGAGTGCAAG         |
| ANGPTL4        | TCCTGGACCACAAGCACCTAGAC      | CGGTTGAAGTCCACTGAGCCA<br>TC |
| LAMB3          | GTATGGCGAGTGGCAGATGA         | GCAGAGAGACAGGGTTCACA        |
| ADRB2          | TTGCTGGCACCCAATAGAAGC        | CAGACGCTCGAACTTGGCA         |
| MAP6           | CCCTCAACAGGCAAATCC           | TTCATGAACCATCTTGTCATC       |
| $\beta$ -actin | TCGTGCGTGACATTAAGGAGAA<br>GC | GGCGTACAGGTCTTTGCGGAT<br>G  |

BDNF, brain-derived neurotrophic factor; GPER1, G protein-coupled estrogen receptor 1; ADRB2, adrenergic receptor b 2; MAP6, microtubule associated protein 6; ANGPTL4, angiopoietin-like protein 4; LAMB3, laminin b 3.
